# Supplementary material for: Solution-processable zinc oxide nanorods and a reduced graphene oxide hybrid nanostructure for highly flexible and stable memristor
Source: Royal Society of Chemistry journal article supplement (doi:10.1039/c9tc03840j), 2019-01-01
Supplement: c9tc03840j1.pdf [file c9tc03840j1.pdf]

Electronic Supplementary Material (ESI) for J. Mater. Chem. C.  
This journal is © The Royal Society of Chemistry 2017

---

## Supporting information

### **Solution-processable zinc oxide nanorods and reduced graphene oxide hybrid nanostructure for highly flexible and stable memristor**

Zhe Zhou<sup>a</sup>, Fei Xiu<sup>a</sup>, Tongfen Jiang<sup>a</sup>, Jingxuan Xu<sup>a</sup>, Jie Chen<sup>a</sup>, Juqing Liu<sup>\*a</sup>, and Wei Huang<sup>\*a,b,c</sup>

<sup>a</sup> Key Laboratory of Flexible Electronics (KLOFE) & Institute of Advanced Materials (IAM), Nanjing Tech University (NanjingTech), 30 South Puzhu Road, Nanjing 211816, China.

E-mail: iamjqliu@njtech.edu.cn; wei-huang@njtech.edu.cn

<sup>b</sup> Key Laboratory for Organic Electronics and Information Displays & Institute of Advanced Materials (IAM), SICAM, Nanjing University of Posts & Telecommunications, 9 Wenyuan Road, Nanjing 210023, China

<sup>c</sup> Shaanxi Institute of Flexible Electronics (SIFE), Northwestern Polytechnical University (NPU), 127 West Youyi Road, Xi'an 710072, China.

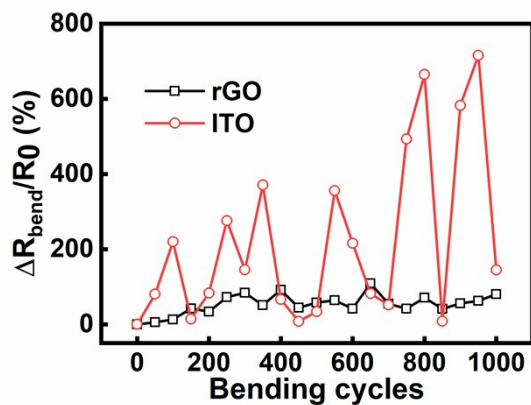

**Figure S1.** The dependence of sheet resistance on bending cycles for rGO thin film (black line) and ITO electrodes (red line).

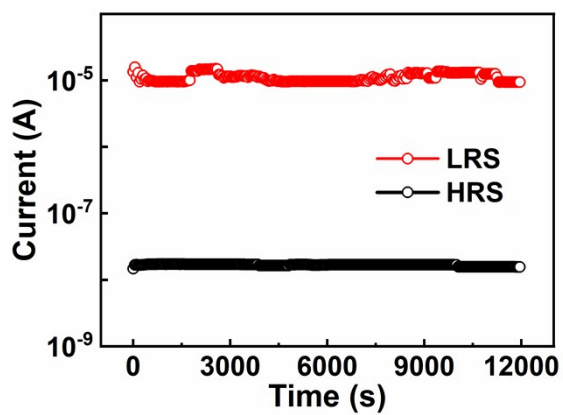

**Figure S2.** Retention of the memristor underwent bending cycles up to 1000.
